# Supplementary material for: Controllable synthesis of three-dimensional nitrogen-doped hierarchical porous carbon and its application in the detection of lead
Source: Royal Society of Chemistry journal article supplement (doi:10.1039/c9ra02270h), 2019-01-01
Supplement: c9ra02270h1.pdf [file c9ra02270h1.pdf]

Supplementary Information for  
**Controllable synthesis of three-dimensional nitrogen-doped  
hierarchical porous carbon and its application in detection  
for lead**

Runying Dai\*, Xue Ma, Quan Xu and Limin Lu \*

Key Laboratory of Crop Physiology, Ecology and Genetic Breeding, Ministry of  
Education, Institute of functional materials and agricultural applied chemistry,  
College of Science, Jiangxi Agricultural University, Nanchang 330045, PR China

\*Corresponding author. Tel./fax: +86 791 83813574;

E-mail: runyingdai@163.com; lulimin816@hotmail.com (L. Lu).

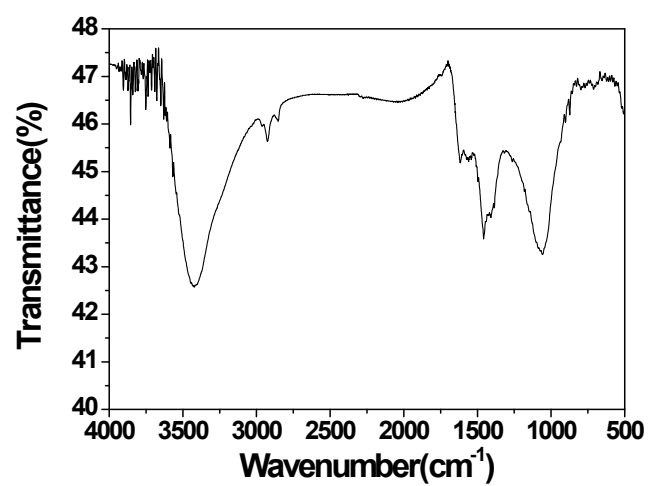

Fig. S1 FT-IR of the N-HPC

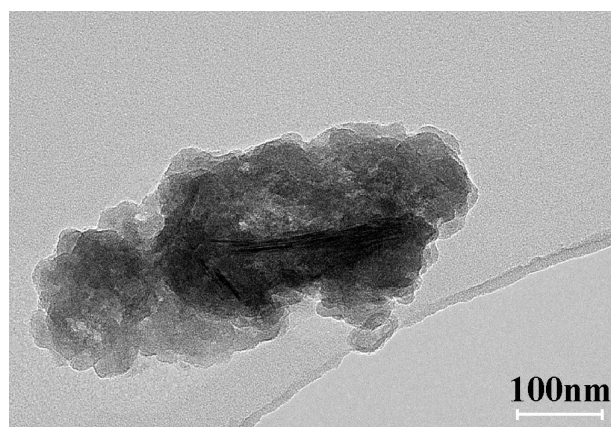

Fig. S2. TEM of N-HPC

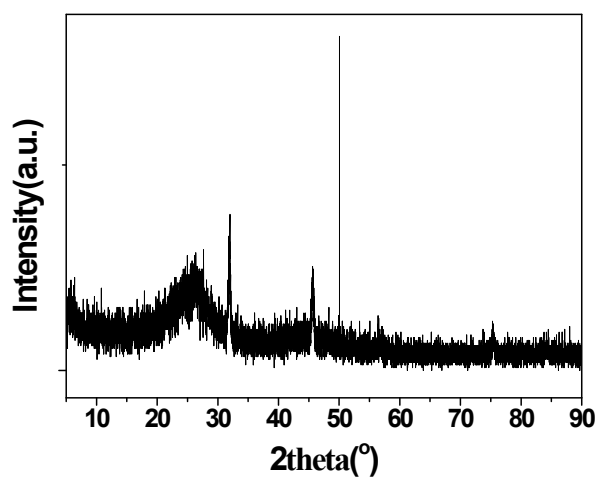

Fig. S3. XRD pattern of the N-HPC

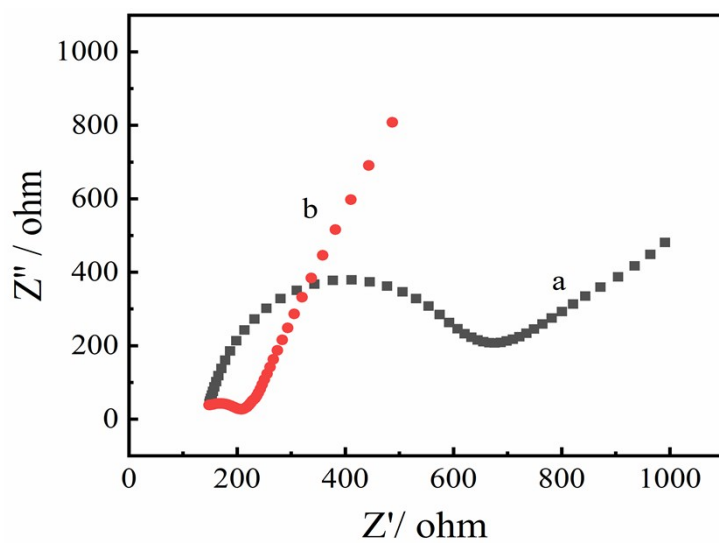

**Fig. S4.** Nyquist plots at bare GCE (a) and N-HPC/GCE (b) and in a solution of 5 mM  $[\text{Fe}_3(\text{CN})_6]$  and 0.1 M KCl with the frequencies from 0.1 to 10000 Hz; Potential: 0.25 V; Amplitude: 0.005 V.

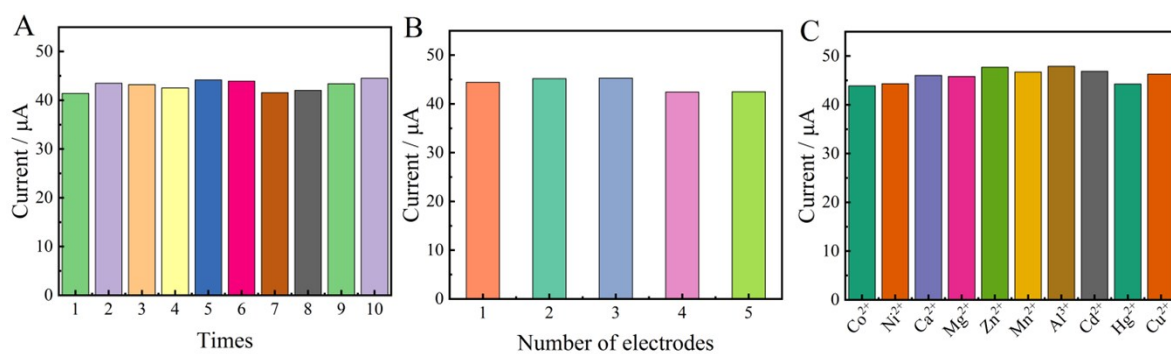

**Fig.S5** The repeatability (A), reproducibility (B) and (C) interferences of N-HPC/GCE
